# Supplementary material for: Asymmetric thiophene/pyridine flanked diketopyrrolopyrrole polymers for high performance polymer ambipolar field-effect transistors and solar cells
Source: Royal Society of Chemistry journal article supplement (doi:10.1039/c6tc04271f), 2016-12-15

## Supporting Information

### Asymmetric Thiophene/Pyridine Flanked Diketopyrrolopyrrole Polymers towards High Performance Polymer Ambipolar Field-effect Transistors and Solar Cells

Gege Qiu,<sup>1a,b</sup> Zhaoyan Jiang,<sup>1c</sup> Zhenjie Ni,<sup>b</sup> Hanlin Wang,<sup>b</sup> Huanli Dong,<sup>b\*</sup> Jianqi Zhang,<sup>c</sup> Xiaotao Zhang,<sup>d</sup> Zhibin Shu,<sup>b</sup> Kun Lu,<sup>c</sup> Yonggang Zhen,<sup>b</sup> Zhixiang Wei,<sup>c</sup> and Wenping Hu<sup>b,d</sup>

---

<sup>a.</sup> *Beijing Key Laboratory for Optical Materials and Photonic Devices, Department of Chemistry, Capital Normal University, Beijing 100048, China.*

<sup>b.</sup> *Beijing National Laboratory for Molecular Sciences, Key Laboratory of Organic Solids, Institute of Chemistry, Chinese Academy of Sciences, Beijing 100190, China. Email: [dhl522@iccas.ac.cn](mailto:dhl522@iccas.ac.cn)*

<sup>c.</sup> *National Center for Nanoscience and Technology, Beijing 100190, China.*

<sup>d.</sup> *Tianjin Key Laboratory of Molecular Optoelectronic Sciences, Department of Chemistry, School of Science, Tianjin University and Collaborative Innovation Center of Chemical Science and Engineering (Tianjin), Tianjin 300072, China.*

†Electronic Supplementary Information (ESI) available: *Synthesis and NMR spectra of monomers, TGA and UPS of polymers*. See DOI: 10.1039/x0xx00000x

<sup>1.</sup> Joint first author.

## 1. Measurement and characterization

Reaction solvents were distilled from Na and benzophenone under nitrogen immediately prior to use.  $^1\text{H}$  and  $^{13}\text{C}$ NMR spectra were recorded on Bruker 400 MHz spectrometer using  $\text{CDCl}_3$  as the solvent and chemical shifts were reported as  $\delta$  values (ppm) relative to an internal tetramethylsilane standard. Thermogravimetric analyses (TGA) were performed on a Netzsch TG 209 under an  $\text{N}_2$  flow at a heating rate of  $10\text{ }^\circ\text{C min}^{-1}$ .

## 2. Synthetic Procedures and Characterizations

**Compound 1.** To a dried three necked flask were added NaH (4.4 g, 60% w/w, 112 mmol), dimethyl carbonate (7.2 g, 40.0 mmol) and toluene (40 mL) under nitrogen. After the mixture was heated to reflux, a solution of 2-acetylthiophene (4.3 mL, 40.0 mmol) in toluene (20 mL) was added dropwise. After the evolution of hydrogen ceased, the reaction was cooled down to room temperature. Glacial acetic acid (12 mL) was added dropwise and then ice-cold water was slowly added. The mixture was dilute with 200 mL of ethyl acetate. The organic layer was separated, washed with water (40 mL) and brine (40 mL) and dried over  $\text{Na}_2\text{SO}_4$ , concentrated in vacuum. The residue was purified by column chromatography over silica gel using a mixture of petroleum ether and EtOAc as eluent and the desired methyl 3-oxo-3-(thiophen-2-yl)propanoate was obtained in 93% yields.

**Compound 2.** Methyl 3-oxo-3-(thiophen-2-yl) propanoate (6.1g, 33.0 mol), methyl 2-bromoacetate (5.0 g, 33.0 mol), sodium carbonate (6.9 g, 50.0 mol), acetone (40 mL) and 1,2 dimethoxyethane (10 mL) were added to a flask. After refluxing for 16 h, the reaction mixture was poured into water and extracted with EtOAc. The organic layers were washed with brine, dried over  $\text{Na}_2\text{SO}_4$ , and concentrated in vacuum. The residue was purified by column chromatography over silica gel using a mixture of petroleum ether and EtOAc as eluent and the desired dimethyl 2-(thiophene-2-carbonyl)succinate was obtained in 98% yields.

**Compound 3.** Acetic acid (50 mL) and ammonium acetate (28.0 g, 0.36 mol) were added to dimethyl 2-(thiophene-2-carbonyl)succinate, the mixture stirred under reflux for 6 h. The product was obtained by filtration after cooling to  $0\text{ }^\circ\text{C}$  and then washed with boiling water followed with boiling methanol. The desired methyl 5-oxo-2-(thiophen-2-yl)-4,5-dihydro-1*H*-pyrrole-3-carboxylate was obtained in 46% yields.  $^1\text{H}$  NMR (400 MHz,  $\text{CDCl}_3$ ):  $\delta$  8.51, (br s, 1H), 7.79 (d,  $J = 3.6\text{ Hz}$ , 1H), 7.59 (d,  $J = 4.9\text{ Hz}$ , 1H), 7.17 (dd,  $J = 4.2, 4.7\text{ Hz}$ , 1H), 3.78 (s, 3H), 3.54 (s, 2H); MS (EI) calcd. for  $\text{C}_{10}\text{H}_9\text{NO}_3\text{S}^+$  ( $[\text{M}]^+$ ): 223, found 223.

**Compound 4.** Sodium (0.68 g, 29.6 mmol) was added to a stirred solution of iron chloride (3 mg) in 2-methylbutan-2-ol (30 mL) and heated to reflux until the complete consumption of sodium. The solution was cooled to  $80\text{ }^\circ\text{C}$  and 5-bromopicolinonitrile (1.83 g, 10.0 mmol) was added in small portions and 5-oxo-2-(thiophen-2-yl)-4,5-dihydro-1*H*-pyrrole-3-carboxylate (1.88 g, 8.4 mmol) was added in one portion. The resulting mixture was stirred at  $120\text{ }^\circ\text{C}$  for 2 h. The reaction was quenched by the addition of glacial acetic acid (5 mL) in methanol (20 mL) and the mixture stirred at  $90\text{ }^\circ\text{C}$  for 10 min. The precipitate was collected by filtration and washed with water and methanol and

dried in vacuum. The 3-(5-bromopyridin-2-yl)-6-(thiophen-2-yl)pyrrolo[3,4-*c*]pyrrole-1,4(2*H*,5*H*)-dione was obtained in 77% yield and used without further purification.

**Compound 5.** To a solution of 3-(5-bromopyridin-2-yl)-6-(thiophen-2-yl)pyrrolo[3,4-*c*]pyrrole-1,4-(2*H*,5*H*)-dione (2.24 g, 6.0 mmol) and 18-crown-6 (10 mg) in DMF (50 ml) was added K<sub>2</sub>CO<sub>3</sub> (3.3 g, 24.0 mmol) and heated to 120 °C for 1 h, then 11-(bromomethyl)tricosane (10.03 g, 24.0 mmol) was added dropwise. After being stirred at 120 °C overnight, the reaction mixture was poured into water and extracted with chloroform. The combined organic layers were washed with water, dried over Na<sub>2</sub>SO<sub>4</sub>, and concentrated in vacuum. The residue was purified by column chromatography over silica gel using a mixture of petroleum ether and dichloromethane as eluent. Finally, the result product was recrystallized from ethanol. 39% yield; deep red solid; TLC (PE: DCM, 3:1 v/v): R<sub>f</sub> = 0.20; <sup>1</sup>H NMR (300 MHz, CDCl<sub>3</sub>): δ 9.06 (dd, *J* = 0.9, 3.9 Hz, 1H), 8.84 (d, *J* = 8.6 Hz, 1H), 8.72 (d, *J* = 2.3 Hz, 1H), 7.98 (dd, *J* = 2.4, 8.6 Hz, 1H), 7.68 (dd, *J* = 0.9, 5.0 Hz, 1H), 7.29 (dd, *J* = 4.1, 4.8 Hz, 1H), 4.31 (d, *J* = 7.3 Hz, 2H), 4.00 (d, *J* = 7.7 Hz, 2H), 1.90, (br s, 1H), 1.63, (br s, 1H), 1.21-1.08 (m, 80H), 0.89-0.85 (m, 12H); <sup>13</sup>C NMR (75 MHz, CDCl<sub>3</sub>): δ 162.41, 161.87, 149.96, 146.48, 142.87, 142.34, 139.53, 136.65, 131.62, 129.48, 128.65, 127.99, 121.85, 110.74, 108.65, 46.33, 46.22, 38.25, 37.76, 31.94, 31.48, 31.19, 30.04, 29.70, 29.65, 29.56, 29.38, 26.41, 26.21, 22.70, 14.13; HRMS (MALDI-TOF-MS) calcd. for C<sub>63</sub>H<sub>105</sub>BrN<sub>3</sub>O<sub>2</sub>S<sup>+</sup> ([M+H]<sup>+</sup>): 1046.7105, found 1046.7106.

**Compound 6.** 3-(5-Bromopyridin-2-yl)-2,5-bis(2-decyltetradecyl)-6-(thiophen-2-yl)pyrrolo[3,4-*c*]-pyrrole-1,4(2*H*,5*H*)-dione (1.047 g, 1.0 mmol) was dissolved in 15 mL chloroform. The solution was purged with argon for 5 min and then *N*-bromosuccinimide (0.196 g, 1.1 mmol) was added in small portions. After stirring at room temperature overnight, the mixture was poured into 100 mL methanol and filtered. The residue was subsequently recrystallized from ethanol. 73% yield; purple solid; TLC (PE: DCM, 3:1 v/v): R<sub>f</sub> = 0.25; <sup>1</sup>H NMR (300 MHz, CDCl<sub>3</sub>): δ 8.83 (d, *J* = 8.6 Hz, 1H), 8.82 (d, *J* = 8.6 Hz, 1H), 8.72 (d, *J* = 2.0 Hz, 1H), 7.98 (dd, *J* = 2.4, 8.6 Hz, 1H), 7.25 (d, *J* = 4.3 Hz, 1H), 4.30 (d, *J* = 7.4 Hz, 2H), 3.92 (d, *J* = 7.7 Hz, 2H), 1.88, (br s, 2H), 1.62, (br s, 2H), 1.21-1.10 (m, 80H), 0.90-0.85 (m, 12H); <sup>13</sup>C NMR (75 MHz, CDCl<sub>3</sub>): δ 162.15, 161.78, 150.03, 146.37, 142.79, 141.43, 139.58, 136.53, 131.64, 130.87, 128.04, 122.02, 120.02, 110.61, 108.83, 46.40, 46.31, 38.25, 37.80, 31.94, 31.47, 31.19, 30.03, 29.99, 29.70, 29.65, 29.57, 29.38, 26.39, 26.19, 22.71, 14.13; HRMS (MALDI-TOF-MS) calcd. for C<sub>63</sub>H<sub>104</sub>Br<sub>2</sub>N<sub>3</sub>O<sub>2</sub>S<sup>+</sup> ([M+H]<sup>+</sup>): 1124.6211, found 1124.6211.

### 3. Thermal and electrical property

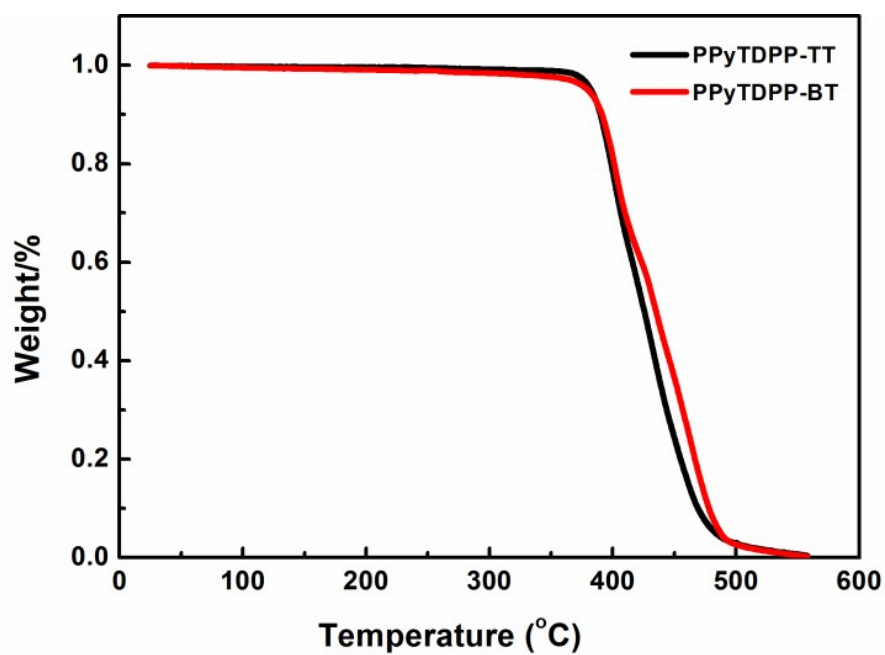

Fig. S1 TGA of PPyTDPP-TT and PPyTDPP-BT.

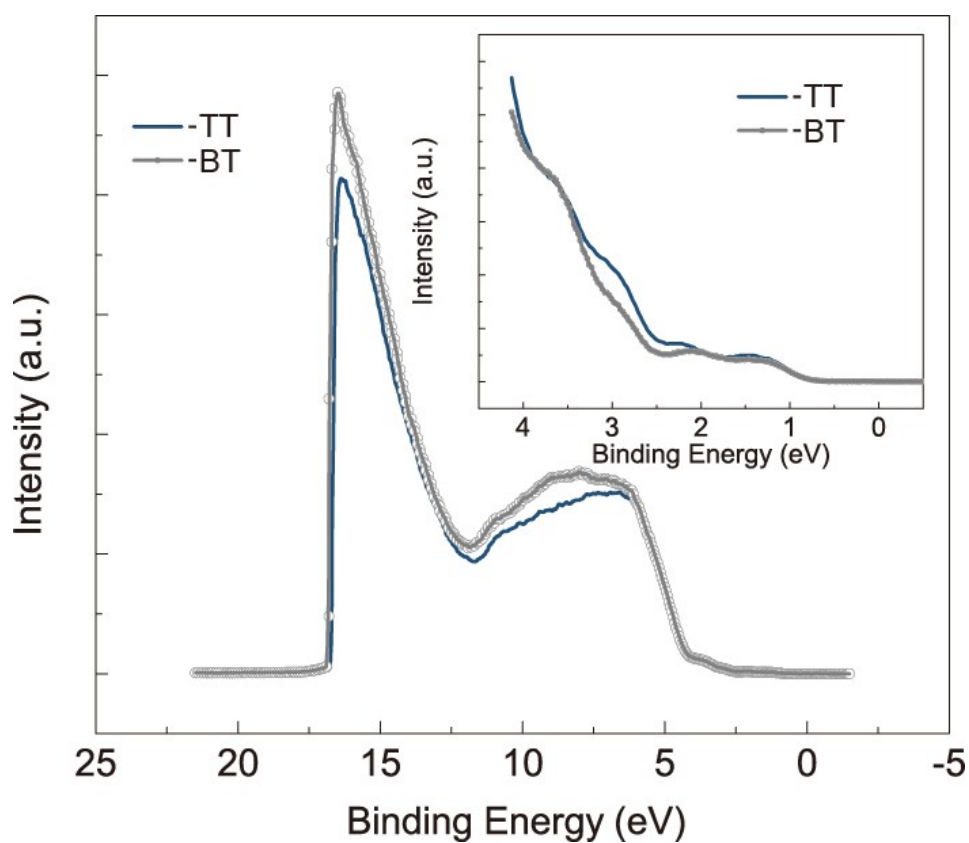

Fig. S2 UPS of PPyTDPP-TT and PPyTDPP-BT. HOMO =  $h\nu + E_{\text{cutoff}} - E_F$ ,  $h\nu = 21.22$  eV.

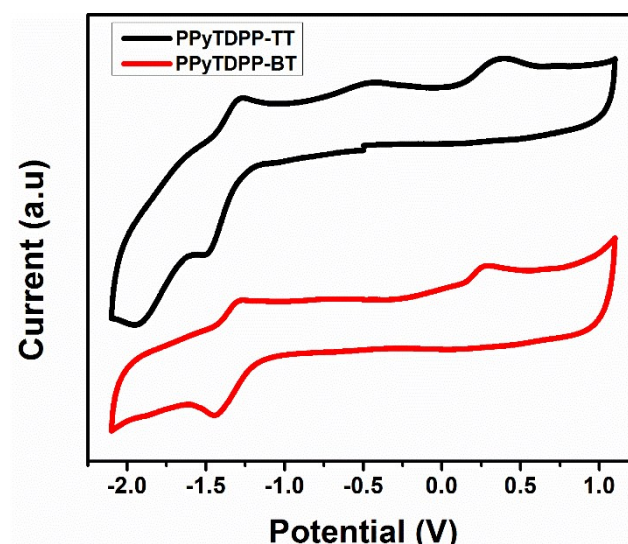

- **Fig. S3** CV curves of **PPyTDPP-TT** and **PPyTDPP-BT** in *o*-dichlorobenzene. (Scan rate = 100 mV s<sup>-1</sup>, electrolyte, 0.1 M n-Bu<sub>4</sub>NPF<sub>6</sub>) with acetylferrocene as reference.

**Table S1** Optimized photovoltaic performances with **PPyTDPP-TT** and **PPyTDPP-BT** after blending with PC<sub>71</sub>BM in different ratios under DIO volume of 5%.

| Polymer          | Ratio | Voc   | Jsc                  | FF    | PCE  |
|------------------|-------|-------|----------------------|-------|------|
|                  | [w/w] | [V]   | [mA/m <sup>2</sup> ] | [%]   | [%]  |
| <b>PPyDPP-TT</b> | 1:1.5 | 0.824 | 8.79                 | 57.48 | 4.16 |
|                  | 1:1   | 0.838 | 8.14                 | 58.42 | 3.99 |
| <b>PPyDPP-BT</b> | 1:1.5 | 0.774 | 11.51                | 68.61 | 6.11 |
|                  | 1:1   | 0.790 | 9.71                 | 66.83 | 5.13 |

**Table S2** Optimized photovoltaic performances with **PPyTDPP-TT** and **PPyTDPP-BT** (as acceptor) after blending with P3HT (1:2, w/w).

| Polymer          | Voc   | Jsc                  | FF    | PCE  |
|------------------|-------|----------------------|-------|------|
|                  | [V]   | [mA/m <sup>2</sup> ] | [%]   | [%]  |
| <b>PPyDPP-TT</b> | 0.815 | 1.83                 | 55.23 | 0.82 |
| <b>PPyDPP-BT</b> | 0.901 | 1.33                 | 49.29 | 0.59 |

<sup>1</sup>H NMR PyTDPP-Br

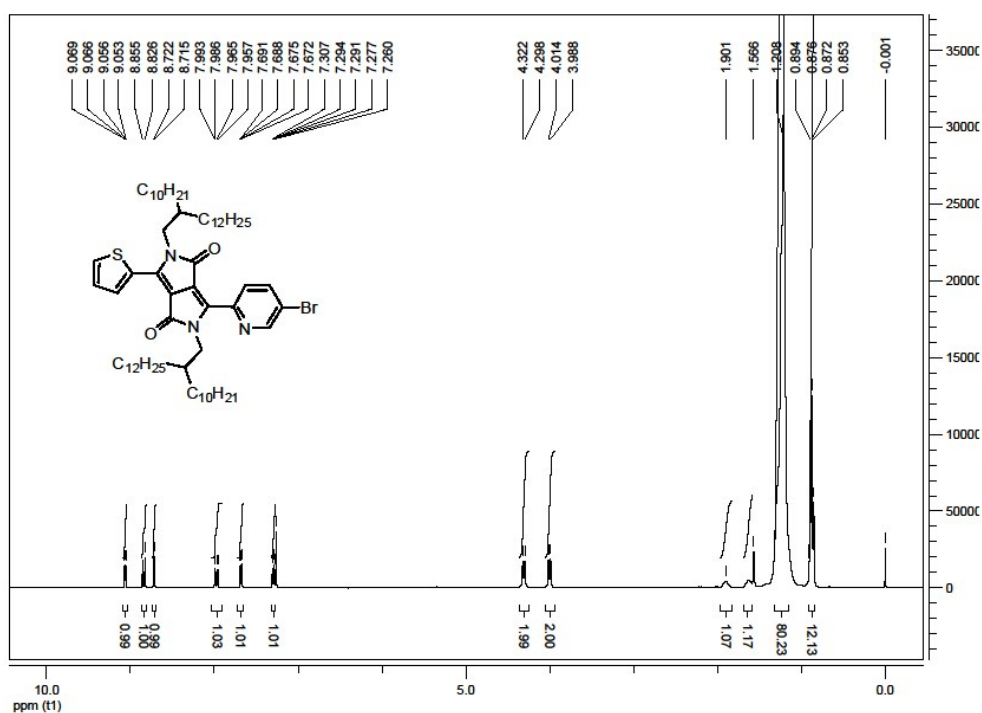

<sup>13</sup>C NMR PyTDPP-Br

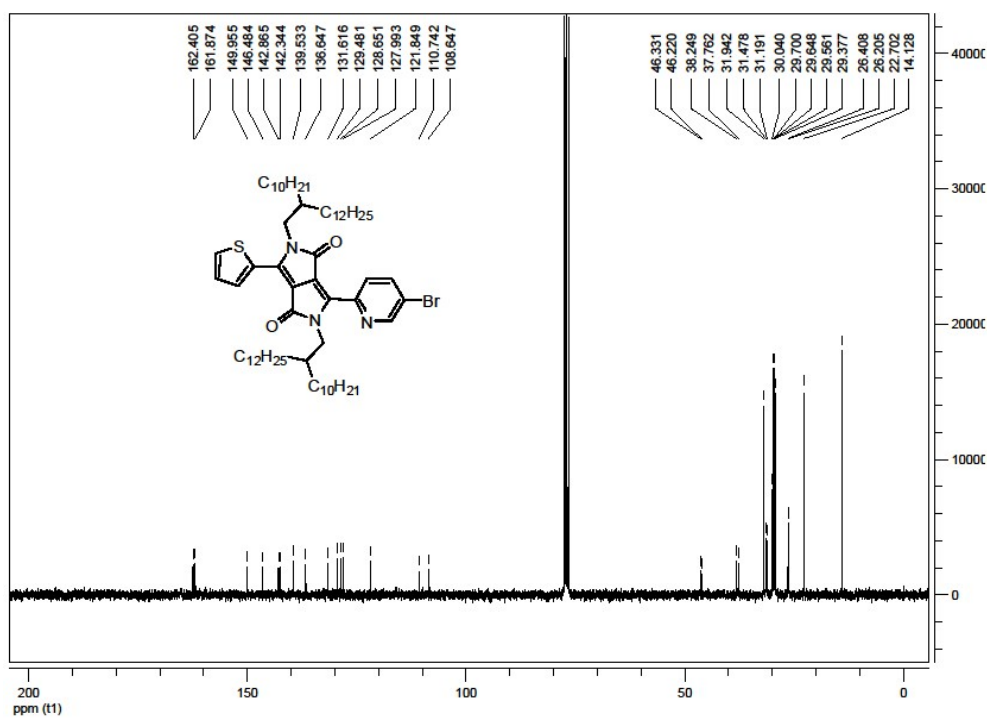

<sup>1</sup>H NMR PyTDPP

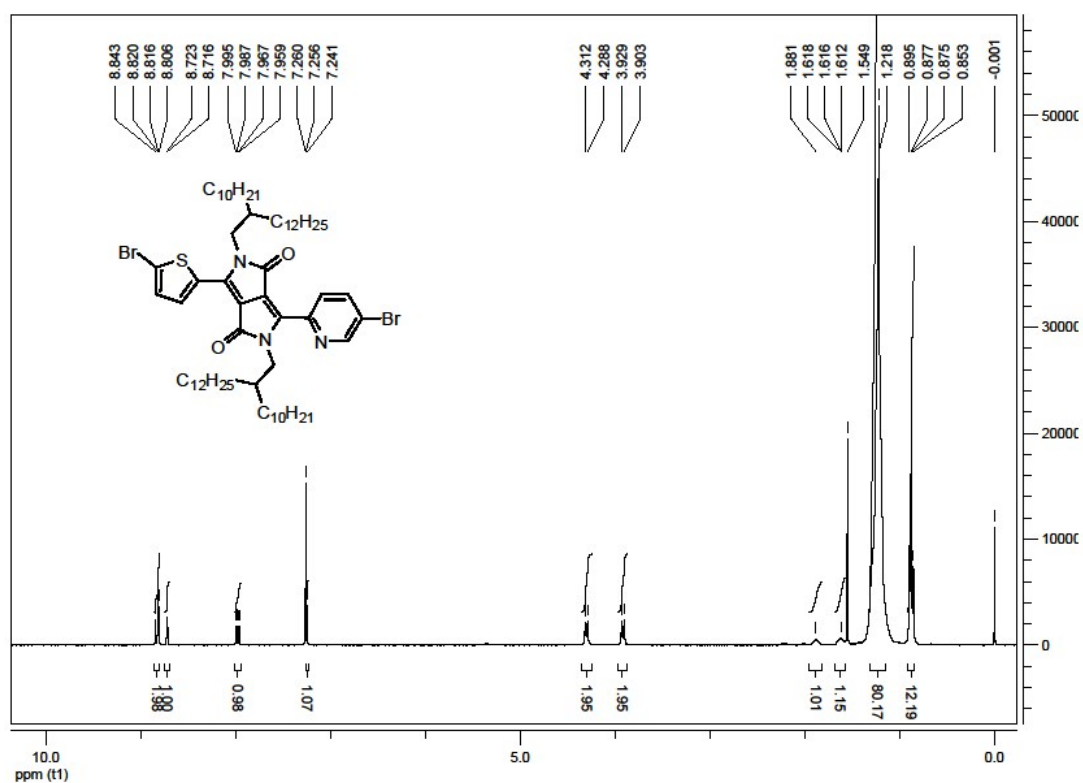

<sup>13</sup>C NMR PyTDPP

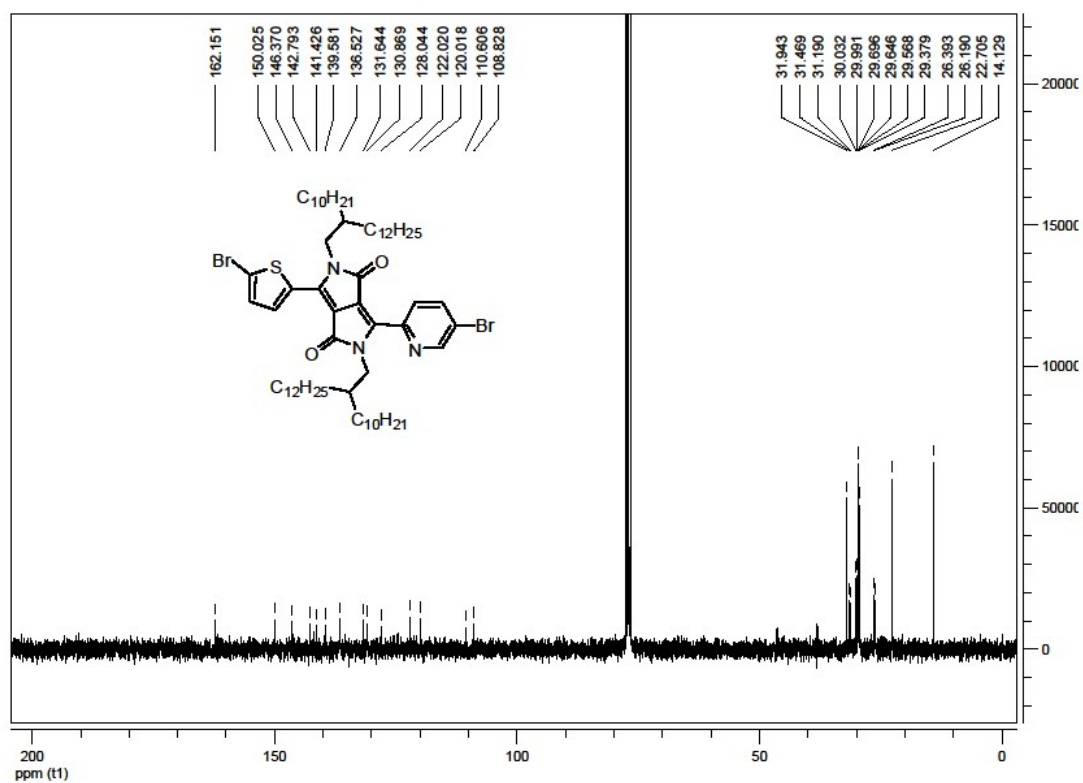

Supplement: c6tc04271f1.pdf [file c6tc04271f1.pdf]
